# Supplementary material for: Non-invasive prediction of post-sustained virological response hepatocellular carcinoma in hepatitis C virus: A systematic review and meta-analysis
Source: PubMed Central journal article supplement — Clin Mol Hepatol. 2024 Aug 12;30(Suppl):S172–85. doi: 10.3350/cmh.2024.0262 (PMC11493359; doi:10.3350/cmh.2024.0262), 2024-08-12
Supplement: cmh-2024-0262-Supplementary-Fig-2.pdf [file cmh-2024-0262-Supplementary-Fig-2.pdf]

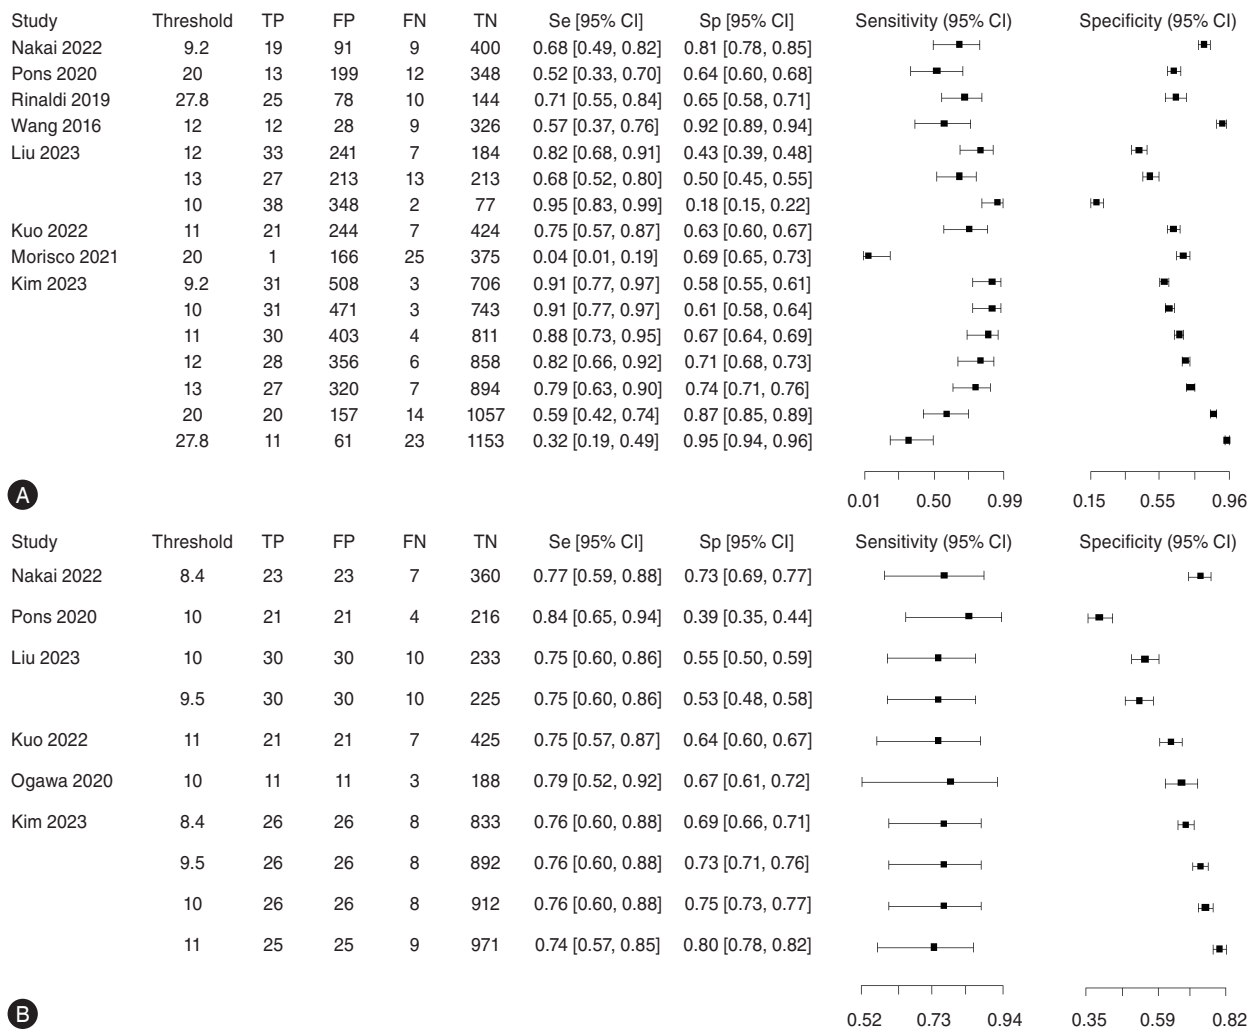

**Supplementary Figure 2.** Forest plots of studies included in the diagnostic accuracy analysis for the prediction of HCC using VCTE measured at (A) pre-treatment and (B) after SVR. HCC, hepatocellular carcinoma; VCTE, vibration-controlled transient elastography; SVR, sustained virological response.
