# Supplementary material for: Non-invasive prediction of post-sustained virological response hepatocellular carcinoma in hepatitis C virus: A systematic review and meta-analysis
Source: PubMed Central journal article supplement — Clin Mol Hepatol. 2024 Aug 12;30(Suppl):S172–85. doi: 10.3350/cmh.2024.0262 (PMC11493359; doi:10.3350/cmh.2024.0262), 2024-08-12
Supplement: cmh-2024-0262-Supplementary-Table-2.pdf [file cmh-2024-0262-Supplementary-Table-2.pdf]

**Supplementary Table 2.** Electronic search strategy

| Classification | Number | Search terms                                                                                                                                                                                              |
|----------------|--------|-----------------------------------------------------------------------------------------------------------------------------------------------------------------------------------------------------------|
| Population     | 1      | Hepatitis C, Chronic/ OR Hepatitis C/ OR (chronic hepatitis C or hepatitis C virus or hepatitis C).tw,kw                                                                                                  |
| Intervention   | 2      | (Fibroscan or fibrosis staging or transient elastography or TE or vibration controlled transient elastography or VCTE or fibrosis-4 or FIB-4).tw,kw.                                                      |
| P&I            | 3      | 1 AND 2                                                                                                                                                                                                   |
| Outcome        | 4      | Carcinoma, Hepatocellular/ OR Liver Neoplasms/ OR (Hepatocellular carcinoma or HCC or liver cancer).tw,kw.                                                                                                |
| P&I&O          | 5      | 3 AND 4                                                                                                                                                                                                   |
| SIGN Filter    | 6      | exp "Sensitivity and Specificity"/ OR (sensitivity OR specificity OR ((pre-test or pretest) adj probability) OR post-test probability OR predictive value* OR predictive value* OR likelihood ratio*).tw. |
|                | 7      | AND 6                                                                                                                                                                                                     |

P, population; I, intervention; O, outcome; TE, transient elastography; VCTE, vibration controlled transient elastography; FIB-4, fibrosis-4 index; HCC, hepatocellular carcinoma.
