# Supplementary material for: Non-invasive prediction of post-sustained virological response hepatocellular carcinoma in hepatitis C virus: A systematic review and meta-analysis
Source: PubMed Central journal article supplement — Clin Mol Hepatol. 2024 Aug 12;30(Suppl):S172–85. doi: 10.3350/cmh.2024.0262 (PMC11493359; doi:10.3350/cmh.2024.0262), 2024-08-12
Supplement: cmh-2024-0262-Supplementary-Table-3.pdf [file cmh-2024-0262-Supplementary-Table-3.pdf]

**Supplementary Table 3.** Patient characteristics of included studies in the systematic literature review and meta-analysis

| Reference                     | Male (%) | Age, years       | AST (IU/L)   | ALT (IU/L)  | Baseline LS (kPa) | Baseline FIB-4                                  | Genotype (%)                                                                           |
|-------------------------------|----------|------------------|--------------|-------------|-------------------|-------------------------------------------------|----------------------------------------------------------------------------------------|
| Kim et al. <sup>3</sup>       | 58.0     | 59.4 (51.7–68.8) | 44 (27–75)   | 38 (22–73)  | 8.0 (5.6–14.0)    | N/A                                             | 1 (52.0); 2 (46.0); 3 (1.0); 4 (0.5); 6 (0.5)                                          |
| Nakai et al. <sup>1</sup>     | 45.7     | 66 (16–92)       | 40 (10–342)  | 38 (5–389)  | 7.1 (2.9–66.4)    | 2.72 (0.29–82.8)                                | 1 (63.3); 2 (34.4); others (2.3)                                                       |
| Pons et al. <sup>2</sup>      | 49.3     | 63.7 (11.1)      | N/A          | 103 (67)    | 20.2 (10.4)       | N/A                                             | 1 (85.8); 2 (1.8); 3 (6.8); 4 (5.6)                                                    |
| Rimaldi et al. <sup>3</sup>   | 55.4     | 68 (61–74)       | N/A          | N/A         | 25.5 (18–35.6)    | N/A                                             | 1 (76.7); 2 (18.6); 3 (3.2); 4 (1.6)                                                   |
| Wang et al. <sup>4</sup>      | 49.2     | 54.1±10.8        | >40 (10.4%)  | >40 (15.2%) | 7.7 ± 6.1         | N/A                                             | 1 (32.3); others (63.8)                                                                |
| Liu et al. <sup>5</sup>       | 42.0     | 65±11            | N/A          | 77 (49–137) | 13.4 (10.5–22.3)  | 3.98 (2.67–6.11)                                | 1 (67.0); others (33.0)                                                                |
| Kuo et al. <sup>6</sup>       | 42.2     | 63.8±10.3        | >40 (12.8%)  | >40 (11.0%) | 12.0±9.3          | 2.87±1.99                                       | 1 (56.5); 2 (38.9); other (4.6)                                                        |
| Morisco et al. <sup>7</sup>   | 54.8     | 64.1±11.7        | N/A          | N/A         | 19.2 (7.9)        | N/A                                             | 1 (80.3); 2 (13.6); 3 (3.8); 4 (2.1); others (0.1)                                     |
| Zou et al. <sup>8</sup>       | 24.5     | 56.7 (8.3)       | N/A          | N/A         | N/A               | >3.25 (39.0%)                                   | N/A                                                                                    |
| Ideno et al. <sup>9</sup>     | 54.6     | 65 (24–90)       | 33.5 (7–367) | 34 (9–436)  | N/A               | 3.38 (0.4–5.38)                                 | 1 (68.8); 2 (29.9); others (1.3)                                                       |
| Kumada et al. <sup>10</sup>   | 49.0     | 62 (53–70)       | 21 (18–26)   | 15 (11–20)  | N/A               | 1.86 (1.26–2.69)                                | 1 (57.9); 2 (41.9); 3 (0.2)                                                            |
| Azzi et al. <sup>11</sup>     | 62.1     | 60.1 (10.5)      | N/A          | N/A         | N/A               | 3.65 (3.41)                                     | 1 (68.9); 2 (4.6); 3 (12.6); 4 (12.3); others (1.7)                                    |
| Caviglia et al. <sup>12</sup> | 57.6     | 65 (57–77)       | 24 (20–29)   | 20 (16–25)  | N/A               | N/A                                             | N/A                                                                                    |
| Tada et al. <sup>13</sup>     | 40.9     | 68 (59.4–76)     | 23 (19–28)   | 15 (12–21)  | N/A               | 2.41 (1.65–3.45)                                | 1 (72.0); 2 (27.4); others (0.6)                                                       |
| Ampuero et al. <sup>14</sup>  | 65.4     | 57.3±9.9         | 83±54        | 92±64       | 19.9±12.3         | N/A                                             | N/A                                                                                    |
| Tahata et al. <sup>15</sup>   | 41.7     | 69 (60–76)       | 39 (28–58)   | 38 (24–61)  | N/A               | N/A                                             | 1 (77.3); 2 (22.1); others (0.6)                                                       |
| Ide et al. <sup>16</sup>      | 39.3     | 64.6±11.9        | 51.0±35.6    | 51.8±45.5   | N/A               | 3.86±3.22                                       | 1 (78.0); 2 (21.7); 1+2 (0.3)                                                          |
| Hiraoka et al. <sup>17</sup>  | 44.7     | 66.9±11.0        | 24.1±10.3    | 17.8±11.6   | N/A               | 2.76±1.77                                       | 1 (71.1); 2 (28.9)                                                                     |
| Kramer et al. <sup>18</sup>   | 96.4     | 61.5±7.6         | N/A          | N/A         | N/A               | <1.45 (41.9%); 1.45–3.25 (45.9%); >3.25 (11.5%) | 1a (55.1); 1a/1b (3.26); 1b (21.45); 1–unknown (2.4); 2 (9.46); 3 (5.66); 4/5/6 (0.95) |
| Ogawa et al. <sup>19</sup>    | 42.4     | 66 (58–73)       | 36 (26–56)   | 32 (21–53)  | 7.5 (5.4–11.4)    | N/A                                             | 1 (72.4); 2 (26.6)                                                                     |
| Tamaki et al. <sup>20</sup>   | 42.4     | 67 (58–75)       | 23 (19–28)   | 16 (12–22)  | N/A               | 2.31 (1.59–3.32)                                | N/A                                                                                    |

Values as median (interquartile range) or mean±standard deviation.

AST, aspartate aminotransferase; ALT, alanine aminotransferase; LS, liver stiffness; FIB-4, fibrosis-4 index; N/A, not available.

<sup>a</sup>Studies lacking data on the characteristics of the entire patient cohort were excluded.
